# Supplementary material
Source: PubMed Central journal article supplement (PMC5117808)
Supplement: NIHMS808252-supplement-1.pdf [file NIHMS808252-supplement-1.pdf]

## Supplementary Information

### **Structural basis for precursor protein-directed ribosomal peptide macrocyclization**

Kunhua Li<sup>1,3</sup>, Heather L. Conurso<sup>1,3</sup>, Gengnan Li<sup>1</sup>, Yousong Ding<sup>2</sup> and Steven D. Bruner<sup>1\*</sup>

<sup>1</sup>Department of Chemistry, University of Florida, Gainesville, FL, 32611, USA.

<sup>2</sup>Department of Medicinal Chemistry, College of Pharmacy, University of Florida, Gainesville, FL, 32610, USA.

<sup>3</sup>These authors contributed equally to this work.

\*To whom correspondence should be addressed: S.D.B (bruner@ufl.edu)

## Supplementary Results

**Supplementary Table 1. MS profiles of MdnA and MdnA variants**

|                                    | MS fragments (positive mode) |        |        |       |       |       | Experi<br>mental | Theoretical |
|------------------------------------|------------------------------|--------|--------|-------|-------|-------|------------------|-------------|
|                                    | +3                           | +4     | +5     | +6    | +7    | +8    |                  |             |
| MdnA                               |                              | 1430.3 | 1144.5 | 953.9 | 817.8 | 715.7 | 5717.5           | 5718.31     |
| MdnA $\Delta$ 1                    |                              | 1426.0 | 1140.8 | 950.8 | 815.3 |       | 5699.5           |             |
| MdnA $\Delta$ 2                    |                              | 1421.4 | 1137.3 | 948.0 | 812.8 | 711.3 | 5681.6           |             |
| MdnA $\Delta$ 3                    |                              | 1416.6 | 1134.1 | 944.8 | 810.2 |       | 5663.8           |             |
| MdnA <sup>1-35</sup>               |                              | 978.4  | 782.9  | 652.7 |       |       | 3909.8           | 3910.37     |
| MdnA <sup>Ac20-49</sup>            | 1189.4                       | 892.3  | 714.1  |       |       |       | 3565.3           | 3563.76     |
| MdnA <sup>Ac20-49</sup> $\Delta$ 1 | 1183.3                       | 887.8  | 710.5  |       |       |       | 3547.2           |             |
| MdnA <sup>11-49</sup>              |                              | 1147.0 | 917.8  | 765.0 |       |       | 4584.0           | 4585.07     |
| MdnA <sup>11-49</sup> $\Delta$ 2   |                              | 1138.1 | 910.7  | 759.1 |       |       | 4548.5           |             |
| MdnA <sup>11-49</sup> $\Delta$ 3   |                              | 1133.6 | 907.0  | 756.0 |       |       | 4530.1           |             |
| MdnA <sup>9-22</sup>               | 770.6(+2)                    |        |        |       |       |       | 1540.2           | 1539.84     |
| MdnA <sup>36-49</sup>              | 913.6(+2)                    |        |        |       |       |       | 1825.2           | 1825.95     |
| MdnA <sup>36-49</sup> $\Delta$ 3   | 886.6(+2)                    |        |        |       |       |       | 1771.6           |             |

**Supplementary Table 2. ITC-based precursor peptide/cyclase interaction**

| Protein                     | Ligand                  | Site         | $K_d$             |
|-----------------------------|-------------------------|--------------|-------------------|
| MdnC                        | MdnA                    | 0.95±0.02    | 112±52 nM         |
| MdnC                        | MdnA <sup>1-35</sup>    | 0.90±0.01    | 146±52 nM         |
| MdnC                        | MdnA <sup>11-49</sup>   | 1.04±0.01    | 308±78 nM         |
| MdnC                        | MdnA <sup>Ac20-49</sup> | <i>n.d.*</i> |                   |
| MdnC                        | MdnA <sup>9-22</sup>    | 1.08±0.02    | 308±62 nM         |
| MdnC                        | MdnA <sup>36-49</sup>   | <i>n.d.</i>  |                   |
| MdnC                        | ATP                     | <i>n.d.</i>  |                   |
| MdnC <sup>AA</sup>          | MdnA                    | <i>n.d.</i>  |                   |
| MdnC <sup>KK</sup>          | MdnA                    | <i>n.d.</i>  |                   |
| MdnC <sup>E293A/N295A</sup> | MdnA                    | 0.84±0.05    | 575±302 nM        |
| MdnC <sup>D281A</sup>       | MdnA                    | 0.71±0.01    | 568±80 nM         |
| MdnB                        | MdnA                    | 0.80±0.10    | 4.85±1.02 $\mu$ M |
| MdnB                        | MdnA $\Delta$ 2         | 1.05±0.09    | 6.45±2.04 $\mu$ M |
| MdnB                        | MdnA <sup>1-35</sup>    | 1.12±0.02    | 2.85±0.77 $\mu$ M |
| MdnB                        | MdnA <sup>Ac20-49</sup> | <i>n.d.</i>  |                   |
| MdnB                        | MdnA <sup>9-22</sup>    | 1.12±0.01    | 1.55±0.25 $\mu$ M |
| MdnB                        | MdnA <sup>36-49</sup>   | <i>n.d.</i>  |                   |

\* *n.d.* - not detected, with no observable heat change during the titration.

**Supplementary Table 3. Data collection and refinement statistics**

|                                                     | SeMet Derivative          |                           | Native                   |                           |
|-----------------------------------------------------|---------------------------|---------------------------|--------------------------|---------------------------|
|                                                     | MdnB                      | MdnC                      | MdnB                     | MdnC+MdnA <sup>1-35</sup> |
| <b>Data collection</b>                              |                           |                           |                          |                           |
| Space group                                         | C121                      | P4 <sub>1</sub>           | C121                     | P4 <sub>1</sub>           |
| Cell dimensions                                     |                           |                           |                          |                           |
| <i>a</i> , <i>b</i> , <i>c</i> (Å)                  | 128.49, 36.13,<br>139.90  | 132.62, 132.62,<br>196.98 | 128.62 37.99<br>139.38   | 132.56, 132.56,<br>198.16 |
| $\alpha$ , $\beta$ , $\gamma$ (°)                   | 90, 116.91, 90            | 90, 90, 90                | 90, 116.55, 90           | 90, 90, 90                |
| Resolution (Å)                                      | 45.2-2.51<br>(2.57-2.51)* | 39.5-2.76<br>(2.81-2.76)  | 33.4-2.28<br>(2.36-2.28) | 39.7-2.66<br>(2.71-2.66)  |
| <i>R</i> <sub>merge</sub>                           | 0.11 (0.66)               | 0.18 (0.80)               | 0.053 (0.41)             | 0.114 (0.67)              |
| <i>R</i> <sub>pim</sub>                             | 0.07 (0.46)               | 0.13 (0.66)               | 0.034 (0.28)             | 0.037 (0.22)              |
| CC(1/2)                                             | 1 (0.93)                  | 0.99 (0.90)               | 1 (0.96)                 | 1 (0.93)                  |
| <i>I</i> / $\sigma$ <i>I</i>                        | 18.7 (1.8)                | 19.4 (2.1)                | 17.0 (3.6)               | 17.1 (3.8)                |
| Completeness (%)                                    | 88.3 (69.1)               | 99.8 (99.7)               | 99.9 (97.1)              | 99.9 (92.8)               |
| Redundancy                                          | 4.6 (4.5)                 | 12.5 (11.4)               | 4.9 (4.9)                | 11.9 (10.8)               |
| <b>Refinement</b>                                   |                           |                           |                          |                           |
| Resolution (Å)                                      |                           |                           | 33.4-2.28                | 39.7-2.66                 |
| No. reflections                                     |                           |                           | 137054                   | 1155055                   |
| <i>R</i> <sub>work</sub> / <i>R</i> <sub>free</sub> |                           |                           | 0.215 / 0.255            | 0.219 / 0.260             |
| No. atoms                                           |                           |                           | 4433                     | 20643                     |
| Protein                                             |                           |                           | 4376                     | 19872                     |
| Precursor peptide                                   |                           |                           | -                        | 771                       |
| Water                                               |                           |                           | 43                       | -                         |
| <i>B</i> -factors                                   |                           |                           | 47.82                    | 55.97                     |
| Protein                                             |                           |                           | 47.81                    | 55.16                     |
| Precursor peptide                                   |                           |                           | -                        | 76.70                     |
| Water                                               |                           |                           | 48.60                    | -                         |
| R.m.s. deviations                                   |                           |                           |                          |                           |
| Bond lengths (Å)                                    |                           |                           | 0.009                    | 0.003                     |
| Bond angles (°)                                     |                           |                           | 1.02                     | 0.64                      |

\*Single crystal was used for each data set; \*Values in parentheses are for highest-resolution shell;

**Supplementary Table 4. Key residues in nucleotide interaction**

| MdnC   | MdnB   | LysX   | RimK   | DDL    | Proposed interaction                |
|--------|--------|--------|--------|--------|-------------------------------------|
| Lys125 | Lys131 | Lys127 | Lys100 | Lys97  | Binds to $\beta$ -phosphate of ATP  |
| Lys166 | Lys171 | Lys87  | Lys141 | Lys144 | Binds to $\alpha$ -phosphate of ATP |
| Gln207 | Gln211 | Gln167 | Glu178 | Glu180 | Hydrogen bond to adenosine N6       |
| Glu215 | Glu219 | Asp176 | Asp187 | Glu187 | Hydrogen bond to ribose O3'         |
| Asp281 | Asp284 | Asp234 | Asp248 | Asp257 | Metal ion coordination              |
| Glu294 | Glu297 | Glu250 | Glu260 | Glu270 | Metal ion coordination              |
| Asn296 | Asn299 | Asn252 | Asn262 | Asn272 | Metal ion coordination              |

**Supplementary Table 5. Oligonucleotides for protein cloning and mutagenesis**

| Protein                         |             | Primers                                                                                             |
|---------------------------------|-------------|-----------------------------------------------------------------------------------------------------|
| MdnB                            | WT          | 5'-GACCTTCATATGAAAGAATCGCCGAA*<br>5'-CTAACTCGAGTCAGTGATGGTGATGGTGA<br>TGGGCGGCGGCACCGAACACCAGAAAATC |
| MdnC                            | WT          | 5'-GCCATATGACGGTAGTGATTGTGACG<br>5'-GACTCGAGTCAGTGATGATGATGATGATG<br>AGCAGCAGCGGAGTTCACCAGAATCTC    |
|                                 | K125A       | 5'-CGCCAACCACgcaCAACTGCAGC<br>5'-TGGTCCACTTTGGCAATC                                                 |
|                                 | K166A       | 5'-TATTGTCACTgcAATGCTGTCCCAG<br>5'-CCGGTCGCTTCAAACCTCT                                              |
|                                 | Q207A       | 5'-GATGACATTTgcAGAAAACATCCCG<br>5'-GGACAAAATTGCAGACCC                                               |
|                                 | Q215A       | 5'-AAAGCACTGGcGCTGCGTATTAC<br>5'-CGGGATGTTTTCTTGAAATGTC                                             |
|                                 | D281A       | 5'-GGCGCCATTGcTATGATCGTG<br>5'-ATAGTTCAGGCCGAAATATTTT                                               |
|                                 | E294A/N296A | 5'-tgcTCCGGTTGGTGAGTTCTTC<br>5'-atcgCCAGGAAGATATAACGTTTCATC                                         |
|                                 | E191K/D192K | 5'-GGTTACAAAAaaaaaaCTGGATAACCTGG<br>5'-GGGCTGGTAAAGACGACC                                           |
|                                 | E191A/D192A | 5'-GTTACAAAAGcagcTCTGGATAACCTGGAG<br>5'-CGGGCTGGTAAAGACGAC                                          |
| <i>SeMet</i><br>( <i>MdnC</i> ) | M25K        | 5'- GCGATCGAAGCAAAAGGCCAAAAAGGCC                                                                    |
|                                 | M104L       | 5'- GTATTCGTGGCCTGATTGCCTCACTGTC                                                                    |
|                                 | M167L       | 5'- CGGTATTGTCACTAAACTGCTGTCCCAGTTCCG                                                               |
|                                 | M181N       | 5'-GGGGATAAACAGGAGGAAAACGTCGTCTTTAC                                                                 |
|                                 | M282I       | 5'-CGCCATTGATATCATCGTGACCCCG                                                                        |

\*Restriction sites are underlined.

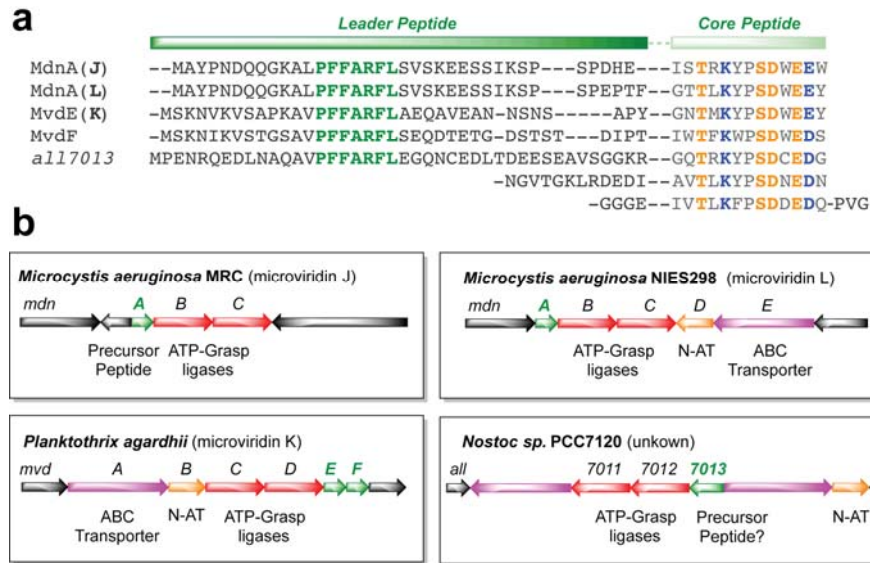

**Supplementary Figure 1. Representative precursor peptides and gene clusters in microviridin biosynthetic pathways.** (a) Aligned precursor peptides have a strictly conserved region (PPFARFL) highlighted in green. Residues involved in the cyclizations are labeled in orange (lactonization) and blue (lactamization). (b) The microviridin J biosynthesis gene cluster in *Microcystis aeruginosa* MRC contains the genes of *mdnA*-*mdnC*, with the notable absence of *mdnD* or *mdnE*-like genes, present in *M. aeruginosa* NIES298. *Planktothrix agardhii* microviridin biosynthetic gene cluster contains two genes (*mvdE* and *mvdF*) encode for two independent precursor peptides. Gene *all7013* in *Nostoc sp.* PCC7120 encodes a putative microviridin precursor peptide with three sequential core peptide region following a leader peptide.

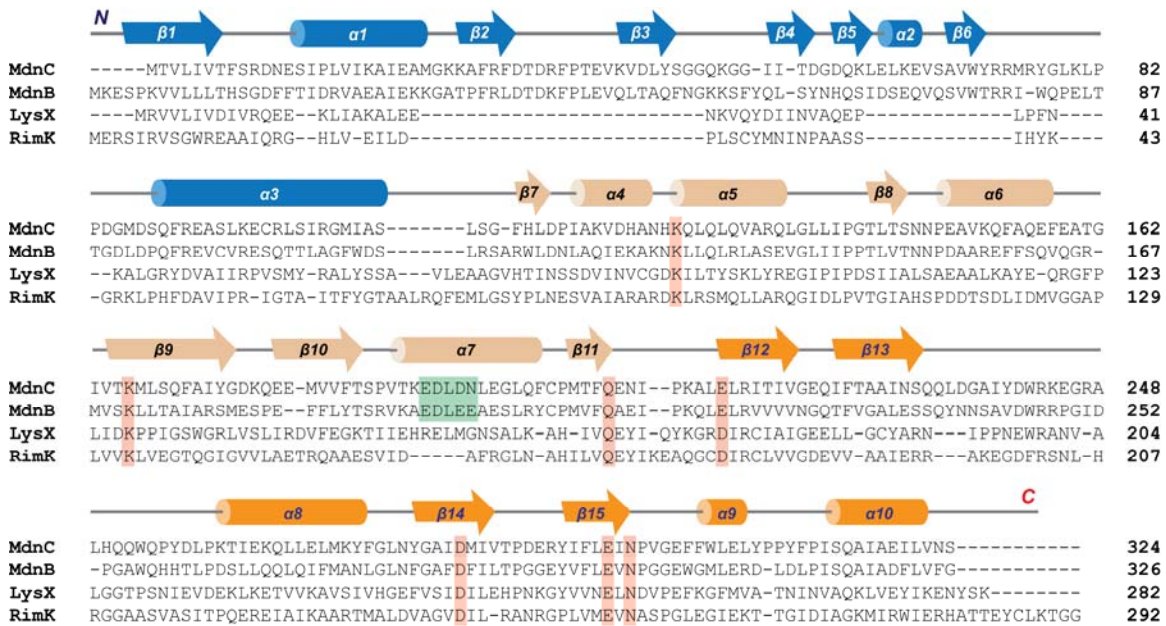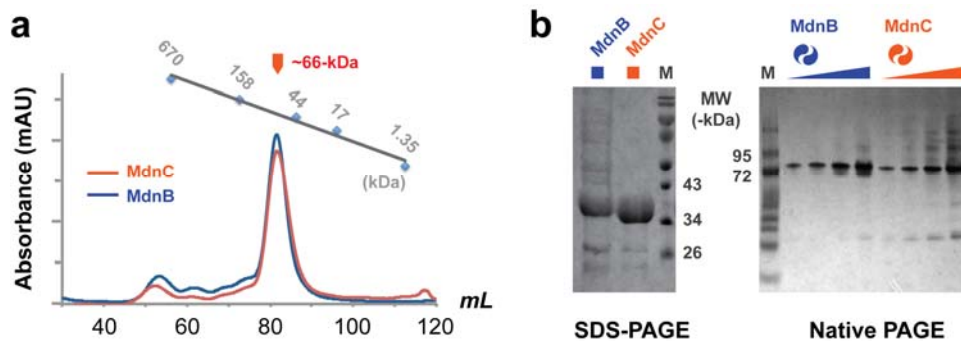

**Supplementary Figure 3. Expression and purification of MdnB and MdnC as dimeric proteins.** (a) MdnC and MdnB shares a similar retention time in size exclusion chromatograph and are predicted to be dimers in solution. Molecular weight standards (BioRad) were plotted as retention volume vs  $\log$  (MW). (b) MdnC and MdnB, with a molecular weight of  $\sim 35$  kDa, run as dimers in native PAGE analysis ( $\sim 80$  kDa).

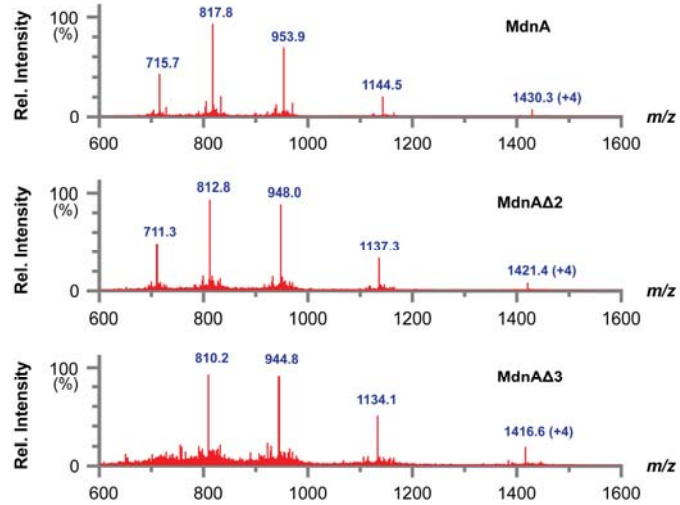

**Supplementary Figure 4. Analysis of full-length MdnA cyclizations.** MdnA and its cyclic products have been identified in MS analysis. Refer to **Supplementary Table 1** for masses.

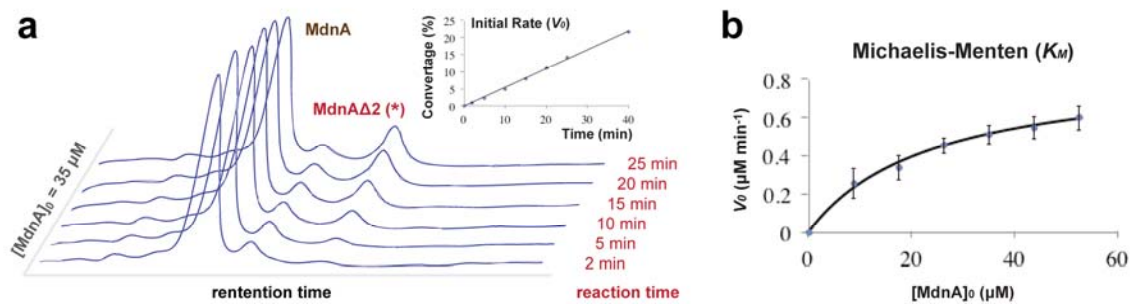

**Supplementary Figure 5. Kinetic analysis of the MdnC catalyzed dicyclization.** (a) Representative HPLC traces for MdnC-catalyzed MdnA dicyclization and initial rate determination. (b) Michaelis-Menten plot created with various initial rates at different substrate concentrations. Each initial rate has been determined as triplets.

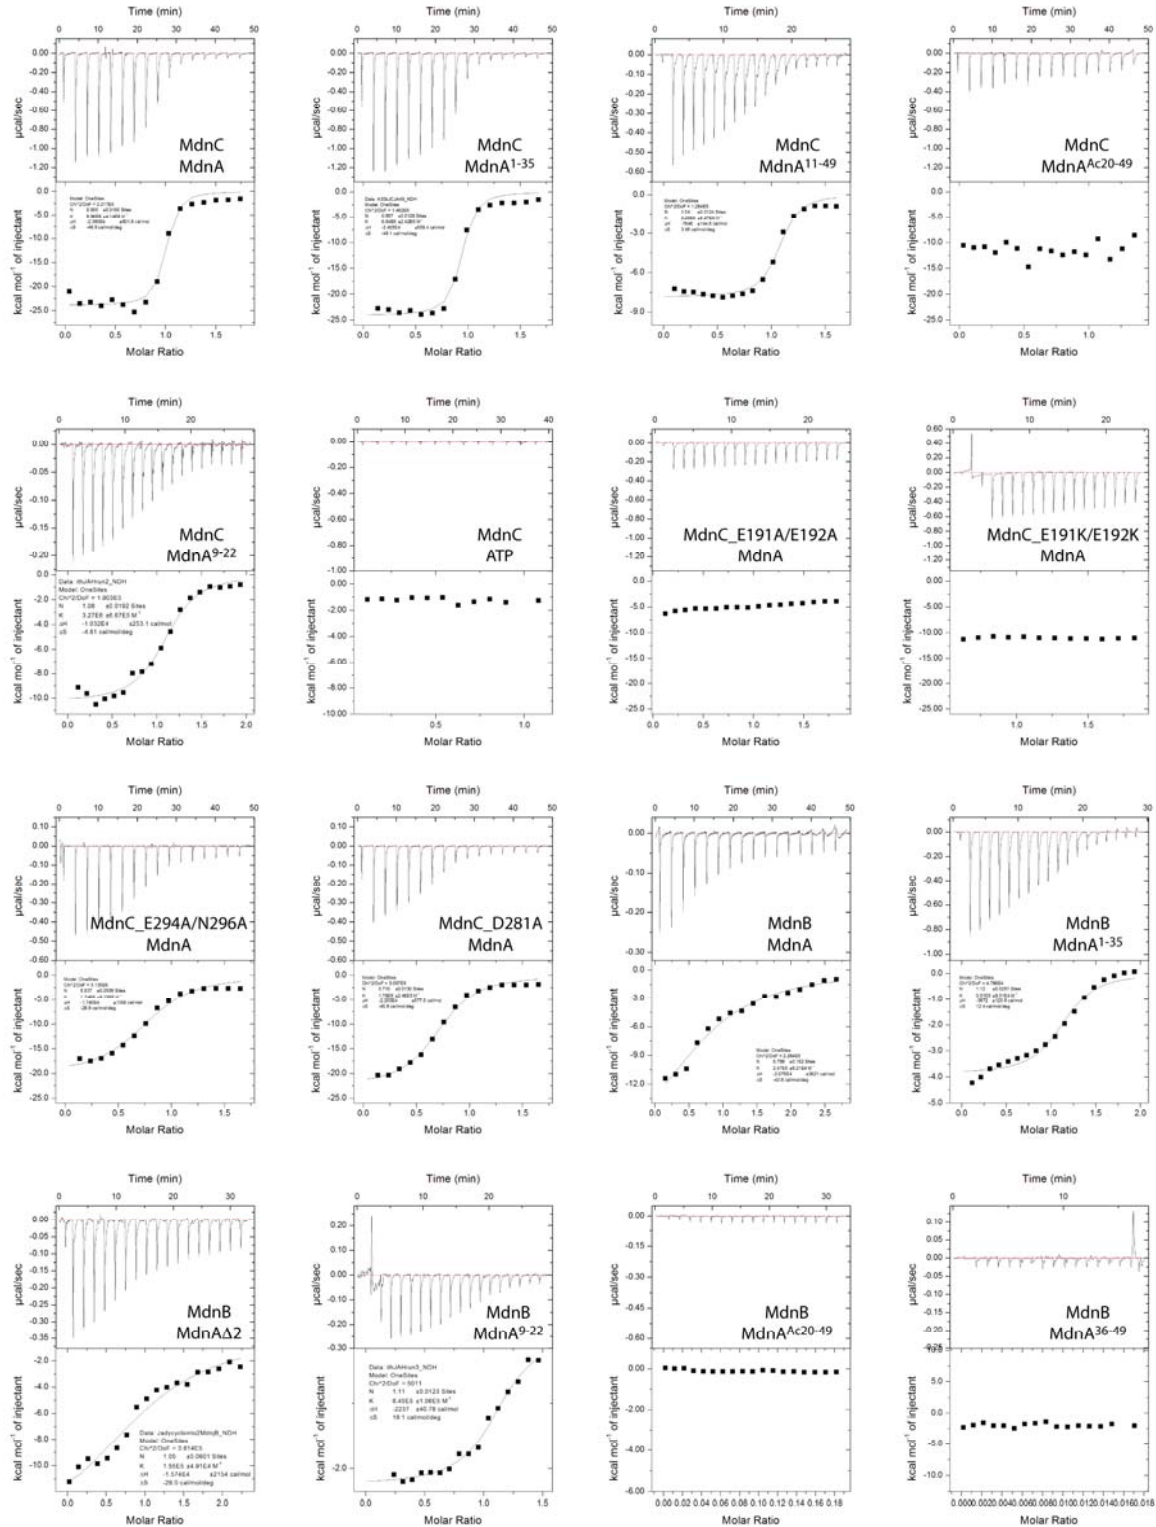

**Supplementary Figure 6. ITC profiles of MdnA variants interact with macrocyclases MdnB and MdnC. Detailed fitting information is listed in Supplementary Table 2.**



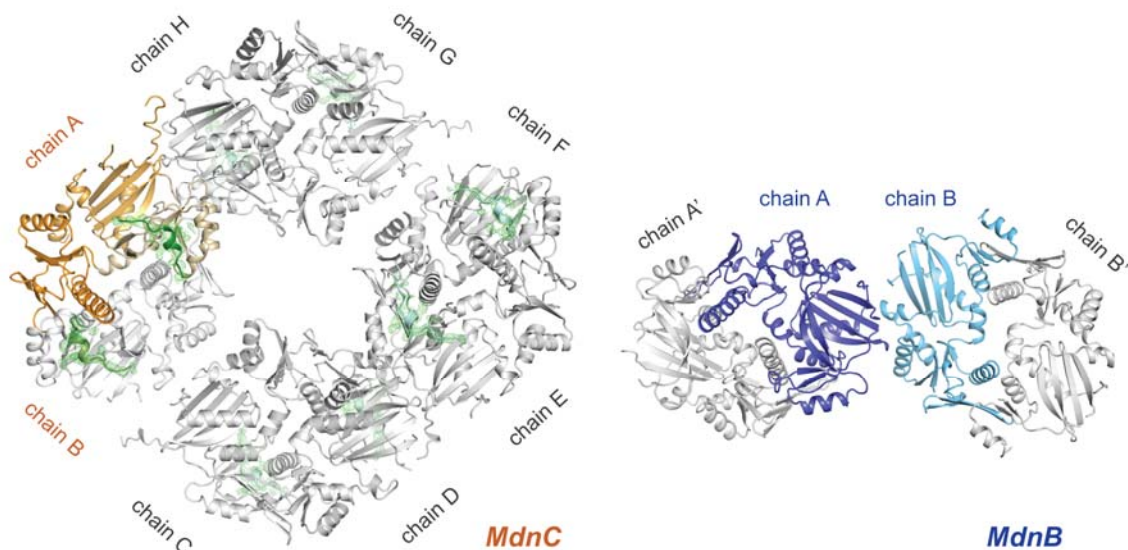

**Supplementary Figure 7. Crystallographic packing of MdnC and MdnB.** MdnC crystals packs in space group  $P4_1$ , with four dimers per asymmetric unit. MdnB crystallize in space group  $C2$ , consisting of two protomers per asymmetric unit. Observed MdnA<sup>1-35</sup> bound with MdnC protomers in 1:1 ratio. Calculated  $mFo-DFc$  difference map corresponds for MdnA fragments is displayed in green at  $2.0\sigma$  contour level.

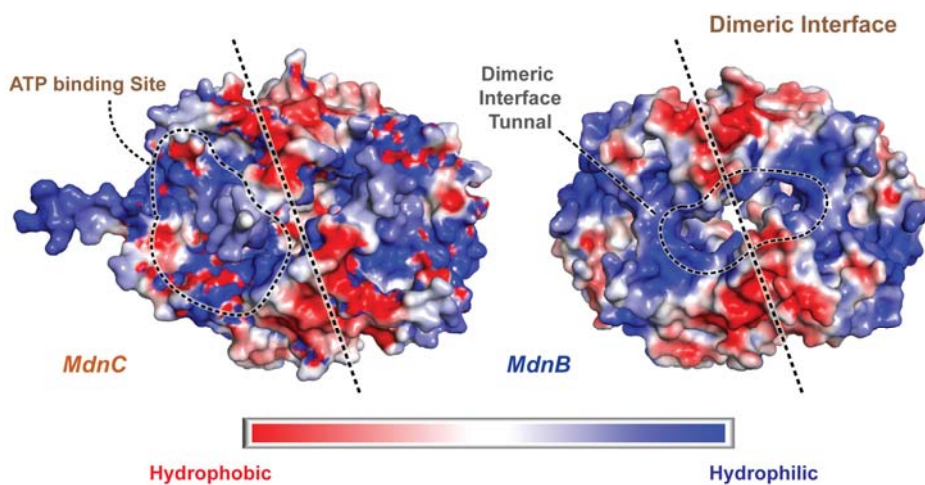

**Supplementary Figure 8. Electrostatics map of MdnC and MdnB dimers.** Color-coded electrostatic surface map. MdnC and MdnB dimers are the same orientations as shown in **Fig 3**. A tunnel-like feature in MdnB dimeric interface has been observed. Hydrophobic residues are assembled near the dimeric interface, while hydrophilic residues are predominantly near the ATP binding site.

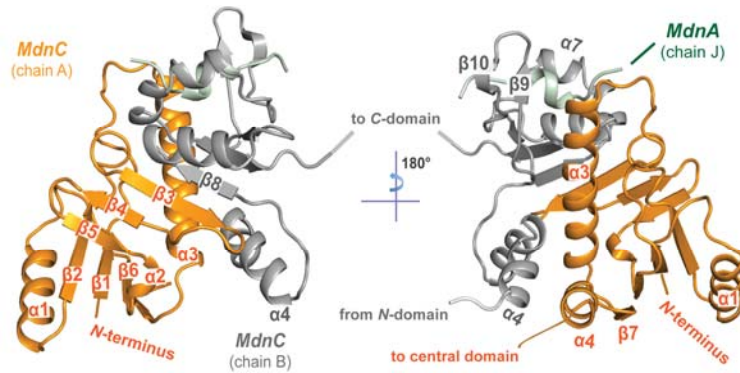

**Supplementary Figure 9. MdnC crystallized as a dimer.** The N-domain of MdnC (chain A) is in orange, while the neighboring central domain (chain B) is in grey. Key interactions between antiparallel  $\beta 3/\beta 8$  stabilize the dimerization. Other interactions include  $\alpha 3/\beta 9$  and  $\alpha 4/\alpha 4$ .

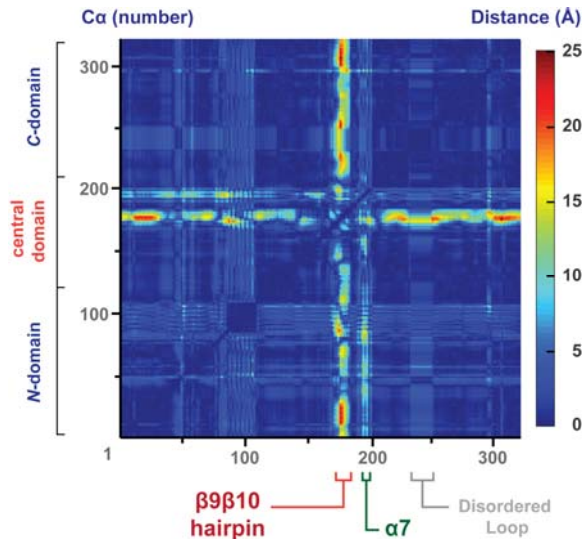

**Supplementary Figure 10. C-alpha distance difference plotting between MdnC and MdnB protomers.** Plot (X, Y) indicate the absolute difference between the distance of residue X C $\alpha$  and residue Y C $\alpha$  in MdnC and MdnB. Amino acid movement between MdnC and MdnB protomers has been observed in  $\beta 9\beta 10$  hairpin and helix  $\alpha 7$  regions.

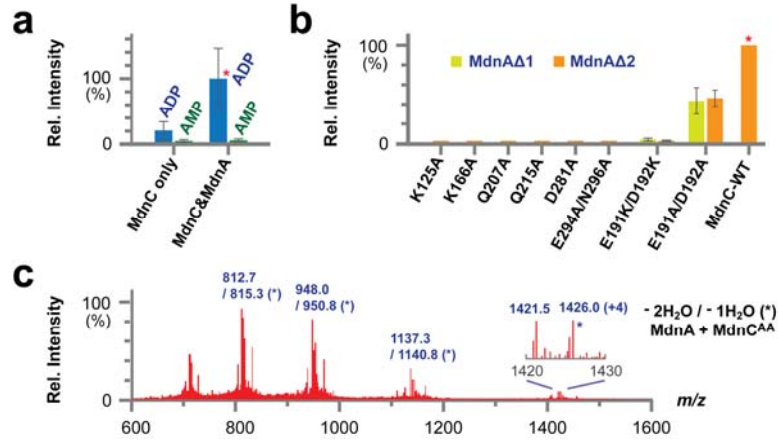

**Supplementary Figure 11.** Characterization of determinants for MdnC catalyzed cyclization. **(a)** Extraction of crude reaction mixture followed by mass spec analysis, relative ion intensity corresponding to ADP and AMP are plotted. MdnC produces ADP but not AMP during the catalysis. **(b)** Mass spec analysis of product formation for MdnC and site-directed mutants. Masses (positive mode) are 1137:1138 for MdnAA2 and 1140:1141 for MdnAA1. Only the MdnC<sup>AA</sup> mutant produces cyclic product. **(c)** MS for the MdnC<sup>AA</sup> reaction mixture, indicating the formation of MdnAA1.

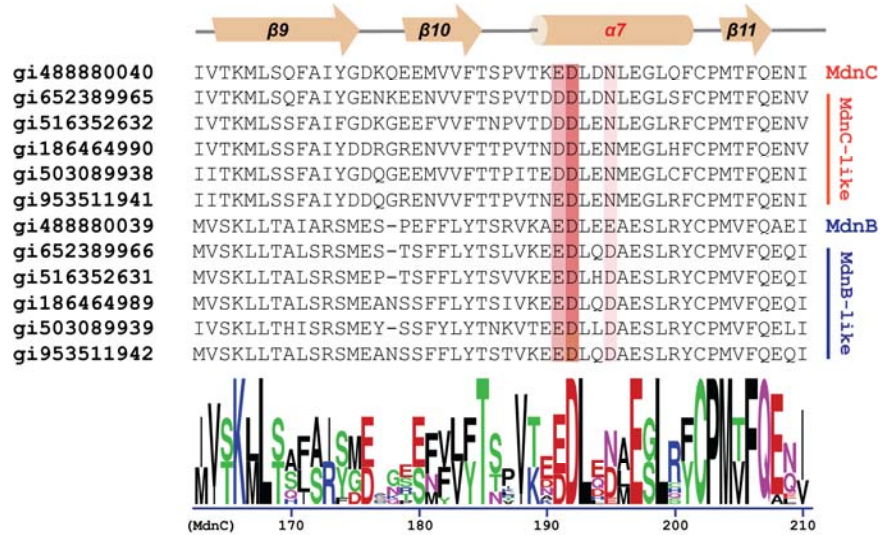

**Supplementary Figure 12.** MdnC central domain interacts with the precursor peptide MdnA. Alignment of the  $\beta$ 9  $\beta$ 10 hairpin and helix  $\alpha$ 7 regions among enzymes in microviridin biosynthetic pathways. D192 (dark red) is well conserved in MdnC-like and MdnB-like homologs. E191 is conserved in MdnC, MdnB and MdnB-like homologs, but is substituted as an aspartate in most other MdnC-like macrocyclases.

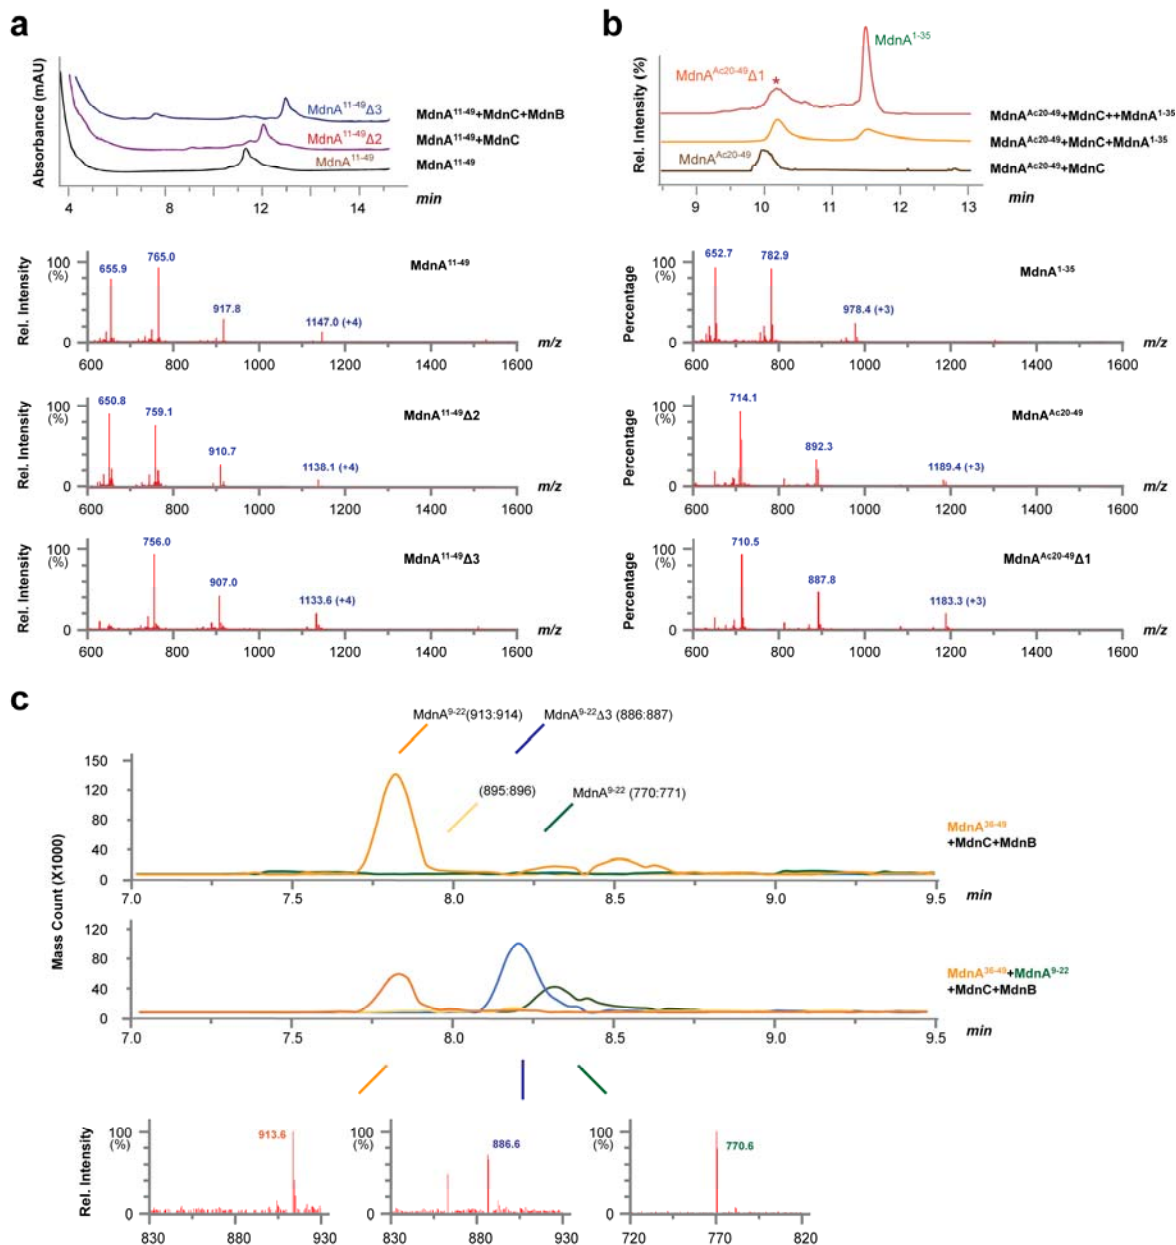

**Supplementary Figure 13. MdnA variants and their macrocyclizations.** (a) MdnA<sup>11-49</sup> can be recognized and processed by both MdnC and MdnB to form the tri-cyclic product, while (b) MdnA<sup>Ac20-49</sup> alone is not an active substrate for MdnC. MdnC can be constitutively activated in the presence of MdnA<sup>1-35</sup>, and catalyze the single cyclization of MdnA<sup>Ac20-49</sup>. However, the single cyclic product, *in trans* reaction cannot be further converged into di (or tri) cyclic product, neither with an extended reaction time, nor with an increased MdnA<sup>1-35</sup> concentration. (c) Similarly, leader peptide-free MdnA<sup>36-49</sup> alone is not an active substrate for MdnC/MdnB, but can be processed *in trans* into the tricyclic product (37°C, 4h reaction time) with inclusion of MdnA<sup>9-22</sup>. Corresponding mass extraction traces are displayed in colors (M<sup>+2</sup> ions).
